# Supplementary material for: Machine learning models for 180-day mortality prediction of patients with advanced cancer using patient-reported symptom data
Source: Springer Nature journal article supplement (doi:10.1007/s11136-022-03284-y), 2022-10-29
Supplement: MOESM1 [file 23656216]

## Appendix A

# Machine Learning Models for 180-day Mortality Prediction of Patients with Advanced Cancer Using Patient-reported Symptom Data

(to be submitted to the *Quality of Life Research Journal*)

Cai Xu<sup>1,2</sup>  • Ishwaria M. Subbiah<sup>3</sup>  • Sheng-Chieh Lu<sup>1,2</sup> • André Pfob<sup>1,4</sup> • Chris Sidey-Gibbons<sup>1,2\*</sup>

<sup>1</sup>MD Anderson Center for INSPIRED Cancer Care (Integrated Systems for Patient-Reported Data),  
The University of Texas MD Anderson Cancer Center, Houston, USA

<sup>2</sup>Department of Symptom Research, The University of Texas MD Anderson Cancer Center,  
Houston, USA

<sup>3</sup>Department of Palliative, Rehabilitation and Integrative Medicine, University of Texas MD  
Anderson Cancer Center, Houston, USA

<sup>4</sup>University Breast Unit, Department of Obstetrics and Gynecology, Heidelberg University  
Hospital, Heidelberg, Germany

 = These authors contributed equally to the manuscript.

### \* Corresponding author

Prof. Chris Sidey-Gibbons, PhD

The University of Texas MD Anderson Cancer Center, Symptom Research CAO

1515 Holcombe Blvd. Unit 1055, Houston, TX 77030-4009

Email: cgibbons@mdanderson.org

## The Edmonton Symptom Assessment System (ESAS-FS)

### Edmonton Symptom Assessment Scale (ESAS-FS)

Please circle the number that best describes your symptoms:

|                                                                                         |                                                                                                  |                             |
|-----------------------------------------------------------------------------------------|--------------------------------------------------------------------------------------------------|-----------------------------|
| No Pain                                                                                 | <hr style="border: 0; border-top: 1px solid black; margin-bottom: 5px;"/> 0 1 2 3 4 5 6 7 8 9 10 | Worst Pain                  |
| No Fatigue                                                                              | <hr style="border: 0; border-top: 1px solid black; margin-bottom: 5px;"/> 0 1 2 3 4 5 6 7 8 9 10 | Worst Fatigue               |
| No Nausea                                                                               | <hr style="border: 0; border-top: 1px solid black; margin-bottom: 5px;"/> 0 1 2 3 4 5 6 7 8 9 10 | Worst Nausea                |
| No Depression                                                                           | <hr style="border: 0; border-top: 1px solid black; margin-bottom: 5px;"/> 0 1 2 3 4 5 6 7 8 9 10 | Worst Depression            |
| No Anxiety                                                                              | <hr style="border: 0; border-top: 1px solid black; margin-bottom: 5px;"/> 0 1 2 3 4 5 6 7 8 9 10 | Worst Anxiety               |
| No Drowsiness                                                                           | <hr style="border: 0; border-top: 1px solid black; margin-bottom: 5px;"/> 0 1 2 3 4 5 6 7 8 9 10 | Worst Drowsiness            |
| No Shortness of Breath                                                                  | <hr style="border: 0; border-top: 1px solid black; margin-bottom: 5px;"/> 0 1 2 3 4 5 6 7 8 9 10 | Worst Shortness of Breath   |
| Best Appetite                                                                           | <hr style="border: 0; border-top: 1px solid black; margin-bottom: 5px;"/> 0 1 2 3 4 5 6 7 8 9 10 | Worst Appetite              |
| Best Feeling of Well-being                                                              | <hr style="border: 0; border-top: 1px solid black; margin-bottom: 5px;"/> 0 1 2 3 4 5 6 7 8 9 10 | Worst Feeling of Well-being |
| Best Sleep                                                                              | <hr style="border: 0; border-top: 1px solid black; margin-bottom: 5px;"/> 0 1 2 3 4 5 6 7 8 9 10 | Worst Sleep                 |
| No Financial Distress<br>(Distress/suffering experienced secondary to financial issues) | <hr style="border: 0; border-top: 1px solid black; margin-bottom: 5px;"/> 0 1 2 3 4 5 6 7 8 9 10 | Worst Financial Distress    |
| No Spiritual Pain<br>(Pain deep in your soul/being that is not physical)                | <hr style="border: 0; border-top: 1px solid black; margin-bottom: 5px;"/> 0 1 2 3 4 5 6 7 8 9 10 | Worst Spiritual Pain        |
