# Supplementary material for: Machine learning models for 180-day mortality prediction of patients with advanced cancer using patient-reported symptom data
Source: Springer Nature journal article supplement (doi:10.1007/s11136-022-03284-y), 2022-10-29
Supplement: MOESM4 [file 23656216]

## Appendix D

# Machine Learning Models for 180-day Mortality Prediction of Patients with Advanced Cancer Using Patient-reported Symptom Data

(to be submitted to *the Quality of Life Research Journal*)

Cai Xu<sup>1,2</sup>  • Ishwaria M. Subbiah<sup>3</sup>  • Sheng-Chieh Lu<sup>1,2</sup> • André Pfob<sup>1,4</sup> • Chris Sidey-Gibbons<sup>1,2\*</sup>

<sup>1</sup>MD Anderson Center for INSPIRED Cancer Care (Integrated Systems for Patient-Reported Data),  
The University of Texas MD Anderson Cancer Center, Houston, USA

<sup>2</sup>Department of Symptom Research, The University of Texas MD Anderson Cancer Center,  
Houston, USA

<sup>3</sup>Department of Palliative, Rehabilitation and Integrative Medicine, University of Texas MD  
Anderson Cancer Center, Houston, USA

<sup>4</sup>University Breast Unit, Department of Obstetrics and Gynecology, Heidelberg University  
Hospital, Heidelberg, Germany

 = These authors contributed equally to the manuscript.

### \* Corresponding author

Prof. Chris Sidey-Gibbons, PhD

The University of Texas MD Anderson Cancer Center, Symptom Research CAO

1515 Holcombe Blvd. Unit 1055, Houston, TX 77030-4009

Email: cgibbons@mdanderson.org

## Descriptive Statistics of the ESAS-FS Measure

**Table 1** Descriptive statistics for the overall ESAS-FS symptom severity (N = 630)

| Symptom               | n   | Mean (Sd)    | 95%CI |       | Symptom severity category <sup>1</sup> |                 |                     |                    |                                   | % Missing |
|-----------------------|-----|--------------|-------|-------|----------------------------------------|-----------------|---------------------|--------------------|-----------------------------------|-----------|
|                       |     |              | LCL   | UCL   | % = 0<br>(none)                        | % 1-3<br>(mild) | % 4-6<br>(moderate) | % 7-10<br>(severe) | % > 4<br>(clinically significant) |           |
| Fatigue               | 629 | 5.34(2.83)   | 5.12  | 5.57  | 8.10                                   | 17.78           | 34.60               | 39.37              | 63.97                             | 0.16      |
| Pain                  | 630 | 5.28(3.06)   | 5.04  | 5.52  | 11.90                                  | 17.94           | 29.21               | 40.95              | 61.27                             | 0.00      |
| Appetite              | 626 | 4.79(3.26)   | 4.54  | 5.05  | 15.56                                  | 20.32           | 28.89               | 34.60              | 54.13                             | 0.63      |
| Well being            | 620 | 4.73(2.61)   | 4.53  | 4.94  | 6.67                                   | 25.87           | 40.00               | 25.87              | 56.67                             | 1.59      |
| Sleep problems        | 629 | 4.58(3.08)   | 4.34  | 4.82  | 12.86                                  | 26.51           | 29.21               | 31.27              | 51.43                             | 0.16      |
| Drowsiness            | 628 | 3.45(2.97)   | 3.21  | 3.68  | 26.35                                  | 28.10           | 25.71               | 19.52              | 37.46                             | 0.32      |
| Anxiety               | 628 | 2.95(3.13)   | 2.71  | 3.20  | 35.71                                  | 27.78           | 18.10               | 18.10              | 29.68                             | 0.32      |
| Shortness<br>breath   | 628 | 2.36(2.84)   | 2.13  | 2.58  | 44.92                                  | 25.24           | 16.51               | 13.02              | 23.33                             | 0.32      |
| Depression            | 628 | 2.24(2.80)   | 2.02  | 2.46  | 47.30                                  | 24.29           | 16.67               | 11.43              | 21.43                             | 0.32      |
| Nausea                | 629 | 2.24(2.95)   | 2.01  | 2.47  | 51.59                                  | 19.21           | 16.67               | 12.38              | 23.65                             | 0.16      |
| Financial<br>distress | 619 | 2.18(2.91)   | 1.95  | 2.41  | 49.84                                  | 21.90           | 13.97               | 12.54              | 22.06                             | 1.75      |
| Spiritual pain        | 613 | 1.17(2.19)   | 1.00  | 1.34  | 65.56                                  | 18.57           | 8.25                | 4.92               | 11.27                             | 2.70      |
| GDS                   | 630 | 37.80(17.29) | 36.45 | 39.16 | —                                      | —               | —                   | —                  | —                                 | 0.00      |
| PHS                   | 630 | 32.63(14.10) | 31.52 | 33.73 | —                                      | —               | —                   | —                  | —                                 | 0.00      |
| PSS                   | 628 | 5.19(5.39)   | 4.77  | 5.62  | —                                      | —               | —                   | —                  | —                                 | 0.32      |

Note: LCL = lower 95% confidence limit; UCL = upper 95% confidence limit; GDS= sum (anxiety +depression) (2 items).

PHS= sum (pain+ fatigue+nausea+drowsiness+shortness of breath+appetite+wellbeing+sleep problems) (8 items).

GDS= sum (fatigue+pain+ appetite +well being + sleep problems+drowsiness+ anxiety+shortness breath+depression + nausea)(10items)

### Reference

1. Seow H, Sussman J, Martelli-Reid L, Pond G, Bainbridge D. Do high symptom scores trigger clinical actions? an audit after implementing electronic symptom screening. *J Oncol Pract.* 2012;8(6). doi:10.1200/JOP.2011.000525

**Table 2** Pearson correlation among ESAS-FS symptom items and composite scores (N = 630)

|                       | Pain | Fatigue | Nausea | Depression | Anxiety | Drowsiness | Shortness<br>breath | Appetite | Well<br>being | Sleep<br>problems | Financial<br>distress | Spiritual<br>pain | GDS  | PHS  | PSS  |  |
|-----------------------|------|---------|--------|------------|---------|------------|---------------------|----------|---------------|-------------------|-----------------------|-------------------|------|------|------|--|
| Pain                  | 1.00 |         |        |            |         |            |                     |          |               |                   |                       |                   |      |      |      |  |
| Fatigue               | 0.28 | 1.00    |        |            |         |            |                     |          |               |                   |                       |                   |      |      |      |  |
| Nausea                | 0.24 | 0.37    | 1.00   |            |         |            |                     |          |               |                   |                       |                   |      |      |      |  |
| Depression            | 0.20 | 0.35    | 0.25   | 1.00       |         |            |                     |          |               |                   |                       |                   |      |      |      |  |
| Anxiety               | 0.23 | 0.28    | 0.24   | 0.65       | 1.00    |            |                     |          |               |                   |                       |                   |      |      |      |  |
| Drowsiness            | 0.26 | 0.50    | 0.33   | 0.30       | 0.26    | 1.00       |                     |          |               |                   |                       |                   |      |      |      |  |
| Shortness<br>breath   | 0.17 | 0.37    | 0.17   | 0.23       | 0.30    | 0.25       | 1.00                |          |               |                   |                       |                   |      |      |      |  |
| Appetite              | 0.17 | 0.37    | 0.35   | 0.20       | 0.16    | 0.33       | 0.24                | 1.00     |               |                   |                       |                   |      |      |      |  |
| Well being            | 0.25 | 0.41    | 0.25   | 0.32       | 0.34    | 0.34       | 0.21                | 0.41     | 1.00          |                   |                       |                   |      |      |      |  |
| Sleep<br>problems     | 0.20 | 0.23    | 0.10   | 0.21       | 0.24    | 0.20       | 0.18                | 0.14     | 0.31          | 1.00              |                       |                   |      |      |      |  |
| Financial<br>distress | 0.21 | 0.13    | 0.12   | 0.32       | 0.27    | 0.16       | 0.10                | 0.13     | 0.17          | 0.17              | 1.00                  |                   |      |      |      |  |
| Spiritual<br>pain     | 0.17 | 0.14    | 0.19   | 0.37       | 0.31    | 0.15       | 0.15                | 0.19     | 0.23          | 0.16              | 0.33                  | 1.00              |      |      |      |  |
| GDS                   | 0.51 | 0.70    | 0.56   | 0.62       | 0.63    | 0.64       | 0.52                | 0.58     | 0.64          | 0.48              | 0.30                  | 0.35              | 1.00 |      |      |  |
| PHS                   | 0.54 | 0.73    | 0.58   | 0.42       | 0.42    | 0.67       | 0.53                | 0.64     | 0.65          | 0.49              | 0.25                  | 0.28              | 0.96 | 1.00 |      |  |
| PSS                   | 0.24 | 0.35    | 0.27   | 0.90       | 0.92    | 0.31       | 0.29                | 0.20     | 0.36          | 0.25              | 0.32                  | 0.37              | 0.69 | 0.47 | 1.00 |  |

Note: GDS= sum (anxiety +depression) (2 items); PHS= sum (pain+ fatigue+nausea+drowsiness+shortness of breath+appetite+wellbeing+sleep problems) (8 items); GDS= sum (fatigue+pain+ appetite +well being + sleep problems+drowsiness+ anxiety+shortness breath+depression + nausea)(10item).
