# Supplementary material for: Machine learning models for 180-day mortality prediction of patients with advanced cancer using patient-reported symptom data
Source: Qual Life Res. 2022 Oct 29;32(3):713–27. doi: 10.1007/s11136-022-03284-y (PMC9992030; doi:10.1007/s11136-022-03284-y)
Supplement: Supplementary file 5 — Supplementary file3 (CSV 38 KB) [file 11136_2022_3284_MOESM5_ESM.csv]

Age	Gender	Race	Phase_I	ECOG_C1D1	NUMBER_CHEMO	PAIN	FATIGUE	NAUSEA	DEPRESSION	ANXIETY	DROWSINESS	SHORTNESS_BREATH	APPETITE	WELL_BEING	SLEEP_PROBLEMS	FINANCIAL_DISTRESS	SPIRITUAL_PAIN	Mortality_M	ALIVE_DEAD	GDS	PHS	PSS
60	female	white	0	1	1	6	5	0	0	0	4	0	5	6	5	0	0	74	alive	31	31	0
67	male	white	0	2	5	0	4	0	0	0	3	1	3	3	5	0	0	3	dead	19	19	0
72	male	white	0	3	5	10	7	5	0	5	3	0	4	5	6	0	2	4	dead	45	40	5
85	female	white	0	2	6	6	5	0	0	0	5	0	2	5	1	0	0	13	alive	24	24	0
66	male	white	0	1	2	8	1	0	3	8	0	0	0	8	7	4	7	22	alive	35	24	11
81	male	white	0	2	5	4	8	6	7	1	8	8	9	8	1	3	1	1	dead	60	52	8
67	female	white	0	2	3	7	4	0	0	0	0	0	3	3	5	0	0	9	alive	22	22	0
65	female	white	0	4	3	5	7	5	2	0	2	0	8	2	0	0	0	17	alive	31	29	2
75	female	white	0	1	7	0	4	3	0	0	0	1	4	0	9	0	0	18	alive	21	21	0
65	female	white	0	2	2	3	5	3	2	2	5	5	2	2	7	7	0	6	dead	36	32	4
78	female	white	0	2	9	7	5	0	0	1	2	0	3	2	1	2	0	11	alive	21	20	1
83	female	white	0	2	3	2	9	1	9	10	0	0	3	7	5	3	2	13	alive	46	27	19
70	female	white	0	3	5	0	9	0	4	8	4	7	9	7	7	0	0	5	dead	55	43	12
65	female	white	0	3	2	5	0	0	0	0	4	1	2	2	2	4	0	4	dead	16	16	0
67	male	white	0	1	0	6	7	6	6	1	7	0	0	8	8	8	0	8	alive	49	42	7
63	male	white	0	1	2	7	4	0	0	0	7	1	4	5	10	2	0	15	alive	38	38	0
65	female	white	0	3	2	4	5	3	4	5	6	7	5	7	2	0	0	0	dead	48	39	9
76	female	white	0	1	7	7	7	0	0	2	5	4	5	3	5	0	0	12	alive	38	36	2
64	male	white	0	3	1	6	10	4	8	10	0	5	2	8	0	3	0	2	dead	53	35	18
67	female	white	0	3	3	0	6	1	4	4	5	0	10	6	3	4	4	15	alive	39	31	8
70	female	white	0	2	3	4	3	1	1	1	1	2	1	2	2	2	2	6	dead	18	16	2
66	female	white	0	3	1	9	8	0	3	8	0	1	3	5	5	0	0	40	alive	42	31	11
70	female	white	0	2	3	8	8	0	0	0	7	0	8	8	2	10	0	0	dead	41	41	0
77	female	white	0	3	2	8	8	6	8	10	6	8	8	10	5	1	3	6	dead	77	59	18
64	female	white	0	3	2	0	2	5	8	8	2	1	3	8	4	7	0	0	dead	41	25	16
65	male	white	0	2	1	0	5	0	2	0	0	0	2	0	2	0	0	7	alive	11	9	2
65	male	white	0	3	2	0	0	0	5	8	1	5	0	3	0	0	0	2	dead	22	9	13
63	male	white	0	1	3	8	4	0	8	7	2	0	2	8	5	1	0	14	alive	44	29	15
64	female	white	0	2	1	4	5	5	4	4	8	5	7	5	8	2	1	2	dead	55	47	8
67	female	white	0	3	1	9	9	7	9	5	3	6	3	5	7	10	0	4	dead	63	49	14
64	female	white	0	3	1	8	1	4	0	4	5	0	8	8	0	0	0	10	alive	38	34	4
63	male	white	0	1	2	4	1	0	0	1	4	1	4	4	4	1	1	16	alive	23	22	1
75	male	white	0	2	1	10	0	0	0	0	0	0	5	2	9	0	0	6	dead	26	26	0
83	female	white	0	1	3	4	4	0	10	10	10	0	0	5	3	0	0	47	alive	46	26	20
63	male	white	0	2	1	8	4	0	3	5	1	4	2	5	3	3	2	10	alive	35	27	8
75	male	white	0	2	2	1	4	6	0	0	1	0	7	6	5	1	0	1	dead	30	30	0
62	male	white	0	3	2	10	7	9	5	7	8	4	7	3	6	5	7	0	dead	66	54	12
63	female	white	0	4	2	5	10	0	8	10	5	5	8	8	10	0	7	1	dead	69	51	18
67	male	white	0	3	2	3	5	0	3	3	0	2	5	5	0	2	0	1	dead	26	20	6
82	male	white	0	4	0	0	8	0	1	0	2	0	4	4	1	2	7	0	dead	20	19	1
83	female	white	0	2	5	7	6	2	0	0	2	3	7	4	7	0	0	61	alive	38	38	0
64	male	white	0	1	3	5	4	7	6	7	3	0	8	7	6	3	1	5	dead	53	40	13
75	male	white	0	2	3	7	4	0	0	0	0	3	5	6	5	0	0	11	alive	30	30	0
63	female	white	0	2	1	5	6	0	0	0	3	0	8	5	5	0	0	15	alive	32	32	0
67	male	white	0	4	3	6	2	1	5	2	6	8	10	4	3	5	6	1	dead	47	40	7
85	female	white	0	3	3	0	7	8	5	3	0	0	8	3	0	0	1	22	alive	34	26	8
70	male	white	0	3	3	6	10	0	0	0	5	0	5	10	0	0	0	20	alive	36	36	0
54	female	white	0	3	3	10	9	8	7	9	9	9	5	4	6	8	7	18	alive	76	60	16
63	female	white	0	3	2	4	9	3	3	3	9	0	9	3	0	7	0	23	alive	43	37	6
62	female	white	0	3	1	8	5	0	0	0	5	3	4	2	0	0	0	23	alive	27	27	0
62	female	white	0	2	0	10	6	6	0	10	0	10	8	5	0	7	0	2	dead	55	45	10
62	female	white	0	2	3	2	2	0	0	1	4	1	1	3	4	0	0	28	alive	18	17	1
62	female	white	0	4	4	10	10	10	8	8	3	10	10	10	10	2	8	0	dead	89	73	16
65	male	white	0	2	3	2	6	0	0	2	0	7	7	9	10	0	0	3	dead	43	41	2
64	male	white	0	3	2	4	5	10	2	2	4	1	6	4	8	5	5	0	alive	46	42	4
63	male	white	0	2	3	9	6	6	3	3	3	5	5	4	3	3	0	4	dead	47	41	6
80	male	white	0	2	2	3	5	0	0	0	2	0	3	2	7	3	0	24	alive	22	22	0
60	female	white	0	2	1	8	3	3	4	3	3	0	7	5	5	10	10	8	alive	41	34	7
73	male	white	0	0	2	7	0	0	9	9	0	0	5	9	9	7	6	19	alive	48	30	18
61	male	white	0	2	1	10	9	4	4	0	5	2	6	6	1	1	0	4	dead	47	43	4
61	male	white	0	2	1	10	9	4	4	0	5	2	6	6	1	1	0	4	dead	47	43	4
71	male	white	0	3	3	6	6	5	7	7	2	3	7	7	7	0	6	1	dead	57	43	14
72	male	white	0	1	6	1	5	0	4	5	8	3	8	7	8	0	0	16	alive	49	40	9
63	female	white	0	4	5	5	6	0	0	6	5	6	6	8	7	0	0	55	alive	49	43	6
67	male	white	0	3	2	0	3	0	8	9	2	0	1	9	7	7	7	0	dead	39	22	17
68	female	white	0	2	4	9	5	9	3	6	2	3	7	8	4	0	0	1	dead	56	47	9
60	female	white	0	2	1	7	8	6	9	7	8	5	7	7	7	3	5	17	alive	71	55	16
65	female	white	0	2	2	5	8	0	0	2	5	0	7	5	1	2	0	7	alive	33	31	2
60	female	white	0	2	1	10	7	0	0	0	5	4	4	4	2	0	0	2	dead	36	36	0
67	female	white	0	1	2	0	6	0	0	0	4		10	2	2	0	0	9	alive	24	24	0
64	male	white	0	3	2	8	9	5	0	1	0	0	7	3	3	5	1	6	dead	36	35	1
62	female	white	0	1	1	8	8	0	0	0	5	1	8	3	1	5	6	0	dead	34	34	0
59	male	white	0	2	0	7	10	7	5	0	3	0	9	5	0	5	0	0	dead	46	41	5
59	female	white	0	3	2	6	6	7	1	3	7	2	10	2	3	4	1	7	alive	47	43	4
70	male	white	0	1	4	6	4	1	1	1	4	0	8	5	5	2	0	4	dead	35	33	2
59	female	white	0	4	0	9	4	0	0	0	6	0	9	5	10	0	0	0	dead	43	43	0
60	male	white	0	1	2	7	9	0	0	0	5	8	1	5	1	0	0	18	alive	36	36	0
63	female	white	0	3	5	0	9	2	0	0	8	0	7	8	0	0	0	0	dead	34	34	0
58	female	white	0	2	1	9	1	6	6	1	1	1	9	6	1	1	1	4	dead	41	34	7
66	male	white	0	3	2	0	8	6	5	7	8	8	10	2	6	2	1	7	alive	60	48	12
57	male	white	0	2	1	6	8	6	6	6	6	3	3	6	6	2	1	0	dead	56	44	12
81	female	white	0	3	9	7	5	5	2	4	5	0	5	8	9	0	0	26	alive	50	44	6
63	female	white	0	3	1	6	6	9	4	4	5	8	7	6	8	5	1	0	dead	63	55	8
57	male	white	0	3	3	0	0	0	0	2	6	0	3	5	3	10	8	1	alive	19	17	2
61	male	white	0	2	5	3	8	3	0	0	3	0	10	8	6	0	0	30	alive	41	41	0
57	female	white	0	1	1	6	10	7	10	10	10	8	10	10	5	0	0	1	dead	86	66	20
59	male	white	0	3	1	9	6	7	8	8	4	2	10	6	6	8	2	0	dead	66	50	16
53	male	white	0	2	3	3	1	0	0	0	0	0	0	0	5	0	0	9	alive	9	9	0
57	female	white	0	4	1	10	4	2	2	5	0	3	8	5	8	2	1	2	dead	47	40	7
61	female	white	0	1	2	7	8	0	0	0	5	0	10	6	0	0	0	25	alive	36	36	0
82	male	white	0	4	2	4	10	7	1	6	3	0	4	9	4	0	0	0	dead	48	41	7
55	male	white	0	3	0	9	8	8	8	10	9	7	7	7	3	5	6	4	dead	76	58	18
76	male	white	0	2	1	10	0	0	0	0	0	0	0	0	0	0	0	1	dead	10	10	0
61	male	white	0	3	2	9	10	0	0	0	0	10	5	10	0	3	0	1	dead	44	44	0
57	male	white	0	1	5	0	10	8	5	0	5	4	10	7	8	0	0	7	alive	57	52	5
59	male	white	0	1	9	4	2	0	2	0	0	0	5	3	7	0	0	27	alive	23	21	2
81	male	white	0	3	1	1	0	1	0	0	0	0	0	1	4	0	0	1	dead	7	7	0
68	female	white	0	2	6	3	4	1	0	1	6	0	2	2	0	0	0	4	dead	19	18	1
62	female	white	0	3	2	7	8	8	2	9	3	8	9	6	8	0	0	9	alive	68	57	11
60	male	white	0	3	3	7	5	0	3	8	1	9	8	7	5	1	2	1	dead	53	42	11
54	male	white	0	3	0	5	4	0	0	3	2	6	5	6	6	5	3	6	dead	37	34	3
71	male	white	0	3	4	8	3	0	2	7	2	1	7	6	3	0	0	2	dead	39	30	9
68	female	white	0	3	7	5	7	8	0	3	8	4	5	5	9	0	0	0	dead	54	51	3
58	male	white	0	4	0	8	9	1	5	6	9	0	1	8	6	0	0	0	dead	53	42	11
59	male	white	0	1	5	9	0	0	0	6	6	0	0	6	9	0	0	10	alive	36	30	6
58	male	white	0	2	4	1	6	1	2	2	2	0	1	7	5	1	1	14	alive	27	23	4
39	female	white	0	2	2	0	2	0	0	0	2	0	2	2	3	1	0	17	alive	11	11	0
53	male	white	0	3	0	8	4	6	0	0	7	0	4	4	6	0	0	0	dead	39	39	0
54	female	white	0	2	3	4	4	0	2	2	3	5	4	4	4	4	0	7	alive	32	28	4
68	female	white	0	3	5	6	10	9	9	9	10	0	4	1	9	1	9	3	dead	67	49	18
65	male	white	0	3	1	3	4	0	2	8	3	3	0	8	0	0	0	0	dead	31	21	10
63	male	white	0	3	4	7	10	7	7	4	8	8	10	10	4	0	0	19	alive	75	64	11
62	female	white	0	3	0	2	0	2	1	2	3	0	7	4	7	0	0	1	dead	28	25	3
76	male	white	0	3	3	2	2	0	0	0	0	0	2	1	1	1	0	5	dead	8	8	0
65	male	white	0	1	3	0	0	0	0	0	0	0	0	0	4	0	0	7	alive	4	4	0
65	male	white	0	4	3	0	0	0	0	0	1	8	6	1	1	0	0	0	dead	17	17	0
58	male	white	0	4	4	6	10	0	0	0	3	3	8	3	0	0	0	0	dead	33	33	0
51	female	white	0	3	1	2	5	0	0	0	2	0	0	3	5	0	0	34	alive	17	17	0
52	male	white	0	3	2	7	7	5	7	7	7	0	10	7	7	5	0	2	dead	64	50	14
67	female	white	0	3	5	3	8	5	1	1	7	0	10	6	1	0	0	16	alive	42	40	2
67	female	white	0	3	8	3	8	5	1	1	7	0	10	6	1	0	0	16	alive	42	40	2
65	male	white	0	1	2	0	3	0	0	0	1	0	5	1	1	0	0	11	alive	11	11	0
50	female	white	0	4	2	6	4	9	0	0	0	0	4	6	5	0	0	3	alive	34	34	0
52	male	white	0	2	1	2	3	3	0	0	0	0	10	5	0	0	0	40	alive	23	23	0
73	female	white	0	3	2	10	5	0	5	7	7	6	6	3	10	3	0	10	alive	59	47	12
54	male	white	0	3	1	10	9	0	1	1	8	0	0	9	9	2	0	41	alive	47	45	2
78	female	white	0	2	0	9	8	1	2	4	7	7	7	8	6	3	1	44	alive	59	53	6
51	female	white	0	1	2	2	8	2	0	1	1	1	4	2	8	3	2	2	dead	29	28	1
64	female	white	0	1	10	4	6	7	0	0	3	4	2	2	0	0	0	4	dead	28	28	0
85	male	white	0	1	7	7	8	2	0	0	7	4	2	5	6	2	0	15	alive	41	41	0
69	male	white	0	1	0	8	6	0	5	5	6	1	0	5	4	0	0	8	alive	40	30	10
81	male	white	0	3	10	8	8	0	5	5	6	8	5	5	8	0	0	30	alive	58	48	10
58	female	white	0	2	3	6	8	0	6	8	8	0	7	7	9	0	0	38	alive	59	45	14
50	male	white	0	1	3	7	5	4	1	0	0	3	0	0	3	0	2	17	alive	23	22	1
65	male	white	0	3	3	10	6	0	0	2	6	2	2	5	10	5	0	5	dead	43	41	2
50	female	white	0	1	2	4	4	0	0	4	2	4	4	5	4	0	0	12	alive	31	27	4
70	male	white	0	1	8	8	6	3	2	2	5	6	0	3	2	0	0	20	alive	37	33	4
53	female	white	0	3	1	6	7	0	0	1	3	9	7	5	5	2	0	0	dead	43	42	1
55	female	white	0	3	3	5	8	0	3	5	7	7	9	5	5	2	2	1	dead	54	46	8
75	female	white	0	4	8	2	6	1	0	0	0	6	1	4	3	1	1	0	dead	23	23	0
50	male	white	0	3	2	7	10	9	1	0	2	2	10	4	8	0	0	14	alive	53	52	1
80	female	white	0	2	4	5	6	3	0	10	8	5	5	5	8	2	0	9	alive	55	45	10
60	female	white	0	1	3	9	2	0	0	1	0	1	7	7	7	0	0	0	dead	34	33	1
69	female	white	0	1	2	6	7	0	0	0	5	8	5	5	8	2	1	24	alive	44	44	0
72	female	white	0	0	10	0	0	0	0	0	0	0	0	0	0	0	0	28	alive	0	0	0
71	male	white	0	3	2	5	5	8	0	0	3	0	5	5	8	0	0	13	alive	39	39	0
52	female	white	0	3	1	0	0	3	0	0	0	0	10	0	0	0	0	3	dead	13	13	0
72	female	white	0	3	9	6	5	0	5	4	4	4	4	4	8	4	0	0	dead	44	35	9
51	female	white	0	2	1	9	10	8	8	8	4	7	8	7	6	2	1	2	dead	75	59	16
58	male	white	0	2	4	7	3	2	1	3	1	3	5	4	3	3	2	7	alive	32	28	4
47	female	white	0	3	0	9	7	6	2	7	7	0	5	9	9	0	0	1	dead	61	52	9
47	male	white	0	4	2	7	7	0	6	7	2	0	0	8	7	0	6	0	dead	44	31	13
54	female	white	0	1	3	9	6	5	2	6	6	3	9	8	9	6	5	16	alive	63	55	8
83	female	white	0	3	2	6	10	7	5	2	7	10	9	6	9	0	0	1	dead	71	64	7
46	female	white	0	2	2	9	4	2	6	0	7	0	10	2	4	0	6	19	alive	44	38	6
46	female	white	0	3	2	8	7	0	0	2	7	3	6	9	4	0	0	1	dead	46	44	2
56	male	white	0	3	2	8	8	7	6	6	7	8	4	1	4	4	1	0	dead	59	47	12
64	female	white	0	3	2	4	8	0	7	5	6	0	4	8	2	2	7	0	dead	44	32	12
72	female	white	0	2	3	6	10	10	9	10	5	8	10	10	7	0	0	9	alive	85	66	19
78	female	white	0	3	11	7	7	7	5	5	1	8	7	7	6	5	7	1	dead	60	50	10
43	male	white	0	3	3	8	5	3	5	5	5	0	3	7	9	9	0	6	dead	50	40	10
45	male	white	0	2	0	4	8	0	0	5	4	7	8	5	8	0	0	0	dead	49	44	5
75	female	white	0	4	3	4	10	0	9	9	8	0	10	9	1	2	0	2	dead	60	42	18
46	male	white	0	2	1	0	9	3	0	3	3	6	7	5	5	1	2	0	dead	41	38	3
63	female	white	0	1	6	6	4	0	1	1	0	1	1	4	1	0	0	29	alive	19	17	2
54	female	white	0	2	3	2	10	2	0	0	5	0	5	5	10	0	0	0	dead	39	39	0
43	female	white	0	3	1	5	4	3	3	3	4	5	5	4	3	1	0	5	dead	39	33	6
50	male	white	0	3	3	3	1	0	0	0	0	0	0	6	0	6	0	9	alive	10	10	0
43	female	white	0	3	1	0	8	10	4	8	5	7	0	5	5	0	0	7	alive	52	40	12
42	male	white	0	4	1	5	6	1	1	1	4	0	2	5	6	1	3	0	dead	31	29	2
74	male	white	0	2	5	9	10	8	0	7	5	2	6	6	4	4	0	7	alive	57	50	7
70	female	white	0	3	7	2	8	0	0	1	3	8	8	10	8	0	2	0	dead	48	47	1
39	male	white	0	2	3	8	9	0	9	10	9	0	4	9	5	10	0	4	dead	63	44	19
28	male	white	0	2	3	7	3	9	0	0	0	0	2	3	1	0	2	25	alive	25	25	0
39	male	white	0	1	2	8	8	2	5	5	3	1	4	5	6	0	0	1	alive	47	37	10
40	male	white	0	1	6	2	4	0	0	0	9	1	0	0	8	0	1	7	alive	24	24	0
53	female	white	0	2	5	0	1	0	3	5	1	0	4	6	4	0	5	33	alive	24	16	8
85	female	white	0	3	1	0	0	0	0	0	0	0	5	0	5	0	0	13	alive	10	10	0
84	male	white	0	2	8	1	7	0	0	0	0	3	4	10	10	0	0	2	alive	35	35	0
39	female	white	0	1	3	7	6	4	4	6	4	0	2	5	3	7	0	10	alive	41	31	10
34	female	white	0	2	5	5	8	8	6	9	6	8	9	9	8	9	9	9	alive	76	61	15
58	female	white	0	2	1	0	7	8	0	0	0	3	10	5	3	0	0	29	alive	36	36	0
34	female	white	0	3	0	9	10	5	1	1	5	0	10	1	0	0	0	0	dead	42	40	2
49	female	white	0	3	4	10	10	10	0	10	10	7	10	10	2	0	7	0	dead	79	69	10
74	male	white	0	3	1	8	6	0	0	0	0	0	0	3	0	0	0	8	alive	17	17	0
33	female	white	0	2	1	10	5	0	2	2	8	5	1	5	2	0	0	6	dead	40	36	4
33	female	white	0	1	1	10	10	0	0	0	5	10	10	9	10	0	0	3	dead	64	64	0
34	female	white	0	2	2	4	5	3	3	3	7	3	4	6	6	1	0	5	dead	44	38	6
33	female	white	0	2	2	7	9	5	2	4	8	6	7	7	8	5	1	1	dead	63	57	6
32	male	white	0	2	1	8	2	1	1	3	6	0	7	8	6	6	7	5	dead	42	38	4
56	female	white	0	3	2	6	5	2	0	0	7	3	0	5	7	0	0	30	alive	35	35	0
79	female	white	0	3	2	8	6	0	5	9	2	0	3	2	2	0	0	24	alive	37	23	14
33	male	white	0	2	2	8	5	0	3	3	0	0	6	5	8	1	0	11	alive	38	32	6
32	female	white	0	2	3	8	10	8	7	7	7	0	10	7	10	0	2	30	alive	74	60	14
38	female	white	0	2	3	7	4	0	2	2	2	2	5	7	7	4	1	27	alive	38	34	4
33	female	white	0	3	1	6	8	9	4	8	4	0	0	5	2	0	0	1	dead	46	34	12
79	female	white	0	1	3	3	7	0	4	4	6	1	10	2	5	7	3	25	alive	42	34	8
47	male	white	0	3	2	4	8	0	5	5	4	4	8	9	1	7	0	0	alive	48	38	10
32	male	white	0	3	1	2	7	0	0	0	6	4	3	3	3	0	0	6	dead	28	28	0
65	male	white	0	1	5	7	7	0	3	3	4	0	0	5	2	0	0	4	dead	31	25	6
28	female	white	0	2	2	7	6	0	3	3	2	1	5	6	5	8	5	2	dead	38	32	6
78	male	white	0	1	1	5	8	6	1	1	1	1	5	5	3	0	10	27	alive	36	34	2
52	female	white	0	4	3	3	3	0	3	3	6	1	3	2	5	0	0	1	dead	29	23	6
33	female	white	0	2	1	10	8	5	0	8	5	5	7	5	5	5	7	12	alive	58	50	8
44	female	white	0	4	4	7	8	0	5	2	9	0	6	6	8	0	3	0	dead	51	44	7
32	male	white	0	2	1	6	2	6	6	6	6	0	1	1	1	0	0	21	alive	35	23	12
25	male	white	0	2	1	5	7	3	1	1	7	0	9	9	8	0	0	3	dead	50	48	2
34	female	white	0	1	4	5	7	8	7	7	3	3	6	6	1	1	0	6	dead	53	39	14
25	male	white	0	3	2	1	0	0	0	2	0	0	5	2	2	0	0	25	alive	12	10	2
47	male	white	0	3	6	4	5	0	8	8	5	2	7	7	6	0	0	0	dead	52	36	16
32	male	white	0	3	1	3	7	0	2	0	0	1	4	5	0	0	0	0	dead	22	20	2
45	female	white	0	2	1	4	9	4	3	8	7	4	9	2	2	8	2	7	alive	52	41	11
26	female	white	0	2	0	10	9	9	8	9	8	5	4	8	10	10	6	24	alive	80	63	17
56	male	white	0	3	1	3	1	2	0	1	3	3	4	4	3	0	0	0	dead	24	23	1
84	female	white	0	1	7	0	8	0	0	9	0	3	5	7	9	0	0	24	alive	41	32	9
24	male	white	0	3	1	9	9	10	2	1	9	1	9	0	9	3	0	1	dead	59	56	3
49	female	white	0	1	2	3	2	0	2	2	1	0	1	1	0	4	2	23	alive	12	8	4
75	male	non-white	0	1	3	2	3	0	0	0	4	5	5	5	3	0	2	19	alive	27	27	0
66	female	non-white	0	3	2	3	10	1	4	3	10	0	10	5	8	0	0	3	dead	54	47	7
67	male	non-white	0	3	2	7	7	0	4	0	0	0	1	5	8	1	9	2	dead	32	28	4
64	male	non-white	0	3	0	0	6	0	3	3	9	6	9	8	8	4	6	0	dead	52	46	6
65	male	non-white	0	1	2	2	5	2	2	4	1	3	7	2	1	4	0	1	dead	29	23	6
59	male	non-white	0	2	5	6	7	0	5	8	0	1	8	8	7	7	6	0	dead	50	37	13
66	male	non-white	0	0	9	7	5	5	4	4	3	2	9	8	2	5	2	1	dead	49	41	8
72	female	non-white	0	2	11	9	9	3	1	1	8	2	10	6	4	0	0	1	alive	53	51	2
43	female	non-white	0	0	0	9	7	5	4	9	0	2	4	9	8	10	5	2	dead	57	44	13
44	female	non-white	0	1	2	10	5	0	0	0	5	0	3	3	3	0	0	30	alive	29	29	0
27	female	non-white	0	4	3	9	6	5	4	8	0	10	0	5	8	7	0	1	dead	55	43	12
69	female	non-white	0	1	7	4	2	0	3	0	0	0	0	3	1	2	1	50	alive	13	10	3
65	male	non-white	0	2	1	5	7	0	0	8	3	4	0	7	9	0	0	1	dead	43	35	8
70	male	non-white	0	2	6	3	4	0	0	0	0	0	5	3	5	0	2	15	alive	20	20	0
65	male	non-white	0	3	0	0	8	0	8	7	8	6	4	2	0	0	2	2	dead	43	28	15
65	female	non-white	0	3	2	10	8	6	3	5	5	4	5	4	8	3	5	7	alive	58	50	8
63	male	non-white	0	4	1	4	8	0	7	5	7	7	4	4	5	0	0	1	dead	51	39	12
64	female	non-white	0	1	2	6	6	0	10	5	5	5	9	8	0	4	3	1	dead	54	39	15
68	female	non-white	0	2	5	9	2	2	4	6	4	3	7	5	4	0	3	3	dead	46	36	10
79	male	non-white	0	1	7	2	8	1	0	0	8	0	10	7	6	0	0	1	dead	42	42	0
63	female	non-white	0	1	3	10	0	0	0	0	4	0	5	5	9	5	1	4	dead	33	33	0
64	female	non-white	0	2	2	6	5	3	0	0	5	3	7	8	0	0	0	0	dead	37	37	0
78	male	non-white	0	3	3	7	3	0	0	7	0	0	5	5	4	6	0	7	alive	31	24	7
62	male	non-white	0	2	1	7	3	0	0	3	0	0	4	5	5	6	0	9	alive	27	24	3
61	female	non-white	0	1	0	3	5	2	3	4	0	4	6	2	0	0	0	33	alive	29	22	7
78	female	non-white	0	0	10	5	2	0	0	0	2	2	2	1	1	0	0	5	dead	15	15	0
60	male	non-white	0	2	1	8	5	0	1	1	1	2	1	1	9	1	1	25	alive	29	27	2
61	female	non-white	0	4	3	0	8	0	0	0	0	0	0	0	0	0	0	2	alive	8	8	0
64	female	non-white	0	3	3	8	4	6	3	3	5	2	10	5	5	6	6	0	dead	51	45	6
57	female	non-white	0	3	0	10	8	0	0	6	4	9	7	2	10	7	0	0	dead	56	50	6
60	female	non-white	0	3	0	5	0	1	0	0	0	5	0	3	3	0	0	26	alive	17	17	0
71	female	non-white	0	1	4	0	5	0	0	5	0	9	0	8	7	0	0	46	alive	34	29	5
54	female	non-white	0	3	2	8	10	7	10	6	5	0	5	2	3	2	3	0	dead	56	40	16
59	female	non-white	0	2	4	8	7	0	8	0	0	0	10	8	5	0	8	4	alive	46	38	8
61	female	non-white	0	1	3	5	2	3	3	3	0	0	3	0	0	3	0	23	alive	19	13	6
57	female	non-white	0	2	1	0	6	0	8	9	0	0	5	5	8	0	0	12	alive	41	24	17
53	female	non-white	0	2	2	10	5	0	0	0	0	0	7	5	0	5	0	12	alive	27	27	0
51	female	non-white	0	3	1	3	7	8	1	1	0	0	4	4	1	3	0	38	alive	29	27	2
69	female	non-white	0	4	0	9	10	2	5	2	7	7	7	1	4	4	0	1	dead	54	47	7
76	female	non-white	0	2	4	9	8	10	3	2	7	5	9	6	10	10	3	43	alive	69	64	5
53	male	non-white	0	3	2	3	2	0	0	2	3	0	0	3	4	0	0	4	alive	17	15	2
52	male	non-white	0	2	2	6	8	5	10	10	8	8	9	8	7	7	5	0	dead	79	59	20
48	male	non-white	0	4	1	3	5	0	0	0	3	0	8	5	3	3	0	5	alive	27	27	0
65	male	non-white	0	2	2	3	8	4	0	0	0	8	3	4	3	3	2	10	alive	33	33	0
50	male	non-white	0	4	3	5	7	5	2	5	5	3	8	3	5	0	3	0	dead	48	41	7
68	female	non-white	0	4	4	6	8	0	0	5	10	0	0	5	0	5	0	0	dead	34	29	5
40	female	non-white	0	3	5	0	9	8	7	0	8	0	10	9	0	0	0	0	dead	51	44	7
35	male	non-white	0	4	1	7	8	0	0	0	6	0	3	4	1	0	0	0	dead	29	29	0
33	male	non-white	0	3	1	1	1	0	0	0	0	0	1	1	1	0	1	8	alive	5	5	0
34	male	non-white	0	2	1	8	0	0	3	2	1	0	5	7	10	7	0	31	alive	36	31	5
46	female	non-white	0	3	0	8	8	1	10	10	4	2	2	2	2	7	0	0	alive	49	29	20
32	male	non-white	0	3	3	8	0	2	0	3	0	1	6	8	1	2	6	1	dead	29	26	3
28	male	non-white	0	3	3	10	9	9	7	0	0	7	6	0	10	8	6	14	alive	58	51	7
30	male	non-white	0	2	2	3	4	4	0	0	3	0	6	4	5	4	3	3	dead	29	29	0
32	female	non-white	0	3	0	9	3	5	0	0	7	0	9	5	1	0	0	0	dead	39	39	0
40	female	non-white	0	3	6	9	7	3	1	3	4	5	5	5	8	7	5	4	dead	50	46	4
25	female	non-white	0	1	4	5	3	2	0	1	0	0	6	6	5	8	2	26	alive	28	27	1
25	female	non-white	0	2	1	6	10	2	7	10	8	7	10	6	10	7	0	0	dead	76	59	17
75	male	non-white	0	2	4	2	3	0	0	0	4	5	5	5	3	0	2	19	alive	27	27	0
66	male	non-white	0	2	1	6	6	0	3	0	2	0	9	4	4	0	0	9	alive	34	31	3
64	female	non-white	0	4	1	9	9	9	9	7	9	8	10	9	9	0	9	1	dead	88	72	16
66	female	non-white	0	2	8	8	4	7	0	2	3	3	6	0	2	0	0	11	alive	35	33	2
62	male	non-white	0	1	1	8	4	0	0	0	4	5	7	6	2	3	3	3	dead	36	36	0
58	female	non-white	0	2	4	2	7	3	2	8	5	7	8	5	8	0	3	24	alive	55	45	10
60	female	non-white	0	0	1	0	0	0	0	0	0	0	1	0	1	0	0	49	alive	2	2	0
51	female	non-white	0	4	2	0	2	0	0	0	1	7	4	2	0	0	0	0	dead	16	16	0
58	male	non-white	0	3	6	4	6	0	0	0	8	0	5	6	3	0	3	0	alive	32	32	0
36	male	non-white	0	2	2	7	5	0	0	0	0	4	4	6	10	0	0	2	dead	36	36	0
34	male	non-white	0	2	3	8	4	0	0	0	3	0	5	5	3	0	0	26	alive	28	28	0
78	female	non-white	0	1	5	0	5	0	0	3	0	3	4	3	2	0	0	86	alive	20	17	3
75	female	non-white	0	1	5	5	0	0	0	0	0	0	0	3	2	3	0	27	alive	10	10	0
67	male	non-white	0	1	1	5	3	0	8	8	3	4	7	3	6	7	7	14	alive	47	31	16
69	female	non-white	0	2	6	6	4	0	8	0	3	5	5	3	7	8	2	22	alive	41	33	8
66	male	non-white	0	3	4	5	0	0	8	10	0	0	6	6	8	8	0	13	alive	43	25	18
66	female	non-white	0	2	4	7	7	3	7	7	5	0	1	5	2	5	0	38	alive	44	30	14
74	female	non-white	0	3	4	5	3	0	4	0	0	3	2	5	0	7	0	6	dead	22	18	4
69	female	non-white	0	4	2	8	7	2	2	5	2	4	8	4	3	7	4	2	dead	45	38	7
64	female	non-white	0	3	0	9	6	0	8	8	1	10	6	4	8	4	1	1	dead	60	44	16
70	male	non-white	0	2	1	0	0	5	0	0	0	0	0	0	0	0	0	13	alive	5	5	0
85	female	non-white	0	1	2	6	3	2	0	1	2	1	1	1	9	0	0	11	alive	26	25	1
66	male	non-white	0	3	3	8	8	1	2	2	5	0	6	4	0	0	0	7	alive	36	32	4
62	female	non-white	0	3	2	8	1	0	1	8	0	0	7	2	5	0	0	7	alive	32	23	9
62	female	non-white	0	2	4	10	5	8	0	0	7	2	5	5	5	5	3	53	alive	47	47	0
71	female	non-white	0	1	5	2	2	0	4	4	0	0	0	3	9	8	0	58	alive	24	16	8
65	female	non-white	0	3	3	6	5	4	5	6	6	0	10	4	7	7	0	0	dead	53	42	11
60	male	non-white	0	3	2	6	7	0	4	5	3	5	5	5	3	2	2	4	dead	43	34	9
60	female	non-white	0	2	1	8	7	5	0	0	8	3	5	5	5	0	0	56	alive	46	46	0
71	female	non-white	0	2	7	4	6	0	6	6	2	0	2	4	5	0	0	8	alive	35	23	12
65	female	non-white	0	3	2	3	6	2	4	2	4	4	10	9	8	4	0	1	dead	52	46	6
77	female	non-white	0	2	5	6	8	6	4	4	5	3	0	8	6	0	0	5	dead	50	42	8
60	female	non-white	0	3	3	7	4	6	2	4	2	2	4	6	5	2	6	2	dead	42	36	6
55	female	non-white	0	3	0	6	5	4	0	3	2	4	5	6	7	3	0	0	dead	42	39	3
64	female	non-white	0	3	3	10	5	0	6	10	0	6	0	5	10	0	9	3	dead	52	36	16
55	female	non-white	0	3	1	9	10	8	0	2	3	0	10	1	0	1	0	4	dead	43	41	2
56	male	non-white	0	3	4	10	6	0	0	0	9	8	0	7	8	3	0	3	alive	48	48	0
54	female	non-white	0	4	1	5	7	5	3	2	5	5	9	4	8	0	0	18	alive	53	48	5
57	female	non-white	0	1	4	10	6	6	8	10	7	7	7	6	1	10	0	2	dead	68	50	18
55	female	non-white	0	4	2	4	4	1	4	6	6	6	6	3	6	1	0	4	dead	46	36	10
55	female	non-white	0	2	3	6	0	0	0	10	0	8	0	5	0	0	0	44	alive	29	19	10
75	female	non-white	0	4	1	0	7	0	4	6	6	4	8	4	0	3	4	0	alive	39	29	10
60	female	non-white	0	2	3	7	7	0	6	0	8	8	7	5	6	5	5	23	alive	54	48	6
59	female	non-white	0	3	2	0	4	4	0	0	0	0	4	4	0	3	0	3	alive	16	16	0
63	male	non-white	0	3	2	10	3	0	2	2	0	0	5	3	0	0	0	4	dead	25	21	4
46	female	non-white	0	3	1	5	6	6	0	0	6	0	3	5	5	0	0	17	alive	36	36	0
35	male	non-white	0	3	3	10	0	2	0	2	3	5	8	8	8	5	3	0	dead	46	44	2
35	female	non-white	0	1	1	10	8	9	0	8	10	8	10	8	5	0	0	15	alive	76	68	8
48	male	non-white	0	1	4	8	8	8	0	0	5	8	8	5	0	0	0	0	alive	50	50	0
48	female	non-white	0	3	6	10	1	0	2	0	0	0	9	3	8	0	0	6	alive	33	31	2
31	female	non-white	0	3	1	10	9	3	3	3	2	8	10	5	8	10	0	8	alive	61	55	6
28	female	non-white	0	2	1	7	10	4	2	3	8	10	5	9	2	2	1	0	dead	60	55	5
77	male	non-white	0	2	6	9	7	8	0	7	3	0	8	7	2	0	0	6	dead	51	44	7
37	female	non-white	0	2	4	8	5	0	1	0	0	0	2	4	6	0	0	5	dead	26	25	1
73	female	non-white	0	3	3	7	7	0	3	7	0	8	0	6	2	2	0	0	dead	40	30	10
25	female	non-white	0	1	1	10	9	3	9	9	9	4	10	9	9	10	7	1	dead	81	63	18
25	female	non-white	0	1	5	5	6	4	0	0	0	0	4	7	10	10	0	13	alive	36	36	0
24	male	non-white	0	3	1	7	10	0	8	8	2	0	0	7	9	1	0	6	alive	51	35	16
70	female		1	1	8	3	3	0	0	0	1	5	2	1	1	0	0	65	alive	16	16	0
67	female		1	1	4	1	5	1	5	5	3	0	2	8	3	7	4	41	alive	33	23	10
74	male		1	1	7	0	5	0	0	0	0	4	8	3	0	0	0	39	alive	20	20	0
68	female		1	1	4	8	3	10	0	5	10	0	10	7	0	0	0	28	alive	53	48	5
64	female		1	1	6	3	5	6	0	0	3	0	5	3	2	4	0	42	alive	27	27	0
78	female		1	1	15	3	3	0	0	2	0	0	4	2	5	0	0	64	alive	19	17	2
63	female		1	1	3	1	4	3	5	4	6	2	2	3	3	5	5	24	alive	33	24	9
78	male		1	0	5	4	2	2	0	0	0	0	3	7	3	0	0	37	alive	21	21	0
63	male		1	1	4	7	6	7	3	1	4	0	0	7	2	2	1	19	alive	37	33	4
66	female		1	1	6	5	7	1	4	3	9	2	8	1	3	0	0	32	alive	43	36	7
62	female		1	1	6	0	3	0	2	3	3	3	4	7	6	3	2	29	alive	31	26	5
64	male		1	1	3	0	8	10	0	0	0	0			0	0	0	31	alive	18	18	0
61	male		1	0	6	0	6	0	0	0	6	0	1	6	4	0	0	38	alive	23	23	0
69	male		1	1	4	0	7	0	0	3	2	8	3	5	6	1	0	20	alive	34	31	3
63	female		1	1	3	9	9	4	4	7	9	5	0	6	8	0	0	55	alive	61	50	11
62	male		1	1	4	5	0	0	0	0	0	0	1	0	1	0	0	7	alive	7	7	0
66	male		1	1	6	6	5	1	0	0	0	0	2	3	3	0	0	10	alive	20	20	0
73	female		1	1	2	6	6	0	0	0	6		0	6	5	0	0	54	alive	29	29	0
64	female		1	1	5	2	2	0	0	0	6	0	4	4	4	2	2	25	alive	22	22	0
62	female		1	1	2	7	9	0	0	0	4	1	6	7	8	6	0	34	alive	42	42	0
73	female		1	1	6	3	2	0	0	0	0	0	2	2	4			20	alive	13	13	0
59	female		1	1	6	4	3	0	0	2	2	1	3	8	6	2	3	22	alive	29	27	2
66	female		1	1	3	0	2	0	2	4	0	0	5	5	7	6	0	46	alive	25	19	6
75	male		1	1	5	3	8	7	0	1	8	0	7	7	0	7	0	27	alive	41	40	1
66	male		1	1	2	7	4	2	2	2	2	2	4	4	5	6	3	26	alive	34	30	4
75	female		1	0	5	0	10	0	0	0	7	0	9	0	5			26	alive	31	31	0
64	female		1	1	9	1	4	0	0	0	0	0	0	2	0	0	0	6	dead	7	7	0
58	female		1	1	4	3	3	0	2	3	3	0	4	3	3	0	2	7	alive	24	19	5
56	male		1	0	4	7	8	2	9	9	7	8	5	5	4	2	9	20	alive	64	46	18
57	female		1	1	7	2	7	3	0	0	1	0	0	2	6	0	0	17	alive	21	21	0
69	female		1	1	7	6	5	0	3	3	7	0	5	5	5	1	0	20	alive	39	33	6
63	male		1	1	5	0	2	0	0	0	1	0	0	2	4	2	0	48	alive	9	9	0
55	male		1	1	2	3	1	0	0	0	0	0	0	1	1	0	0	24	alive	6	6	0
54	female		1	1	4	0	5	0	0	5	0	0	0	4	4	0	0	49	alive	18	13	5
60	female		1	1	2	0	3	0	0	4	2	0	2	2	1	0	0	9	alive	14	10	4
55	male		1	1	6	7	5	2	0	0	1	1	4	6	7	7	0	8	alive	33	33	0
58	female		1	1	5	4	7	5	2	4	8	2	8	8	8	2	0	4	dead	56	50	6
73	female		1	1	5	0	3	0	0	0	0	0	0	0	0	0	0	11	alive	3	3	0
53	female		1	1	2	6	6	4	4	4	4	6	7	6	6	5	2	48	alive	53	45	8
54	female		1	1	3	4	5	0	0	4	2	0	4	4	4	3	2	16	alive	27	23	4
68	female		1	1	6	7	5	0	4	3	0	0	2	3	7	0	0	12	alive	31	24	7
57	female		1	1	10	0	0	0	1	1	0	0	1	1	1	0	0	5	dead	5	3	2
57	female		1	1	6	4	2	0	0	4	7	0	0	2	5	0	1	3	dead	24	20	4
62	male		1	1	4	2	2	0	0	0	2	0	0	0	3	1	0	20	alive	9	9	0
65	female		1	0	5	0	0	4	0	3	2	1	0	0	0	0	0	38	alive	10	7	3
66	female		1	1	3	3	0	0	0	0	2	0	2	2	7	0	0	11	alive	16	16	0
61	male		1	1	3	6	7	6	0	3	7	0	6	5	6	5	0	7	alive	46	43	3
65	female		1	1	13	0	7	0	0	0	7	0	5	5	7	0	0	19	alive	31	31	0
78	female		1	1	7	0	1	0	0	1	0	0	0	1	10	1	0	43	alive	13	12	1
55	male		1	1	6	6	5	0	0	0	3	3	3	4	4	0	0	4	dead	28	28	0
57	female		1	1	4	4	4	0	2	5	3	3	1	3	5	1	2	6	dead	30	23	7
53	female		1	1	4	10	7	7	5	7	7	7	7	8	9	1	2	2	dead	74	62	12
59	male		1	1	4	1	3	1	0	1	1	0	4	3	1	0	0	4	dead	15	14	1
79	female		1	1	11	4	3	0	0	0	0	0	0	1	0	0	0	28	alive	8	8	0
77	male		1	1	6	8	6	0	0	2	3	0	4	4	4	5	0	15	alive	31	29	2
54	male		1	1	2	7	0	0	0	0	5	0	0	0	7	0	0	9	alive	19	19	0
55	male		1	1	4	0	9	4	0	0	5	1	9	4	7	0	0	0	dead	39	39	0
56	female		1	1	2	4	6	8	0	6	2	0	10	5	5	0	0	5	dead	46	40	6
64	female		1	1	5	0	3	0	0	0	0	0	8	5	3	0	0	5	dead	19	19	0
58	male		1	2	7	0	6	6	0	2	5	6	8	6	3	0	0	9	alive	42	40	2
54	male		1	1	5	10	5	0	3	2	0	0	8	2	0	6	2	3	dead	30	25	5
58	female		1	1	2	5	4	0	0	0	4	1	8	5	8	0	0	27	alive	35	35	0
59	female		1	1	3	6	8	0	5	3	8	4	9	6	4	2	0	1	dead	53	45	8
54	male		1	1	2	0	0	4	0	0	5	0	5	7	5	8	0	9	alive	26	26	0
52	female		1	0	2	6	4	0	0	5	0	0	2	2	5	9	0	14	alive	24	19	5
61	female		1	1	1	7	5	1	0	2	8	4	7	6	4	0	0	1	dead	44	42	2
63	male		1	0	2	8	8	4	4	4	6	5	5	5	5	10	7	3	dead	54	46	8
53	female		1	2	5	8	5	1	0	0	5	3	0	5	3	0	0	0	dead	30	30	0
73	female		1	1	6	7	6	7	5	6	5	2	4	4	4	4	0	8	alive	50	39	11
43	male		1	1	3	6	7	1	3	9	6	4	10	7	5	1	1	12	alive	58	46	12
51	female		1	1	6	3	0	2	0	0	0	0	0	0	8	5	0	13	alive	13	13	0
63	female		1	0	2	8	2	3	0	5	0	0	0	2	4	0	0	12	alive	24	19	5
59	female		1	1	3	1	5	1	0	5	4	6	7	3	5	5	0	1	dead	37	32	5
65	male		1	1	2	3	4	2	8	8	0	0	0	5	4	0	0	3	dead	34	18	16
50	male		1	1	4	8	5	0	0	0	6	4	0	7	8	2	0	3	dead	38	38	0
56	female		1	1	5	5	5	0	3	0	3	0	0	5	10	6	0	6	dead	31	28	3
58	female		1	1	5	3	8	0	0	0	8	0	5	5	0	5	0	7	alive	29	29	0
52	male		1	1	1	8	5	1	0	0	0	0	7	5	7	0	0	2	dead	33	33	0
56	male		1	1	4	0	5	0	3	2	4	0	10	5	4	2	2	6	dead	33	28	5
62	male		1	1	4	7	8	5	7	8	4	1	9	9	3	5	7	26	alive	61	46	15
51	male		1	1	3	5	7	0	0	5	7	7	10	8	8	0	0	1	dead	57	52	5
61	male		1	1	6	4	4	0	0	0	0	4	5	5	5	0	0	5	dead	27	27	0
56	male		1	1	4	9	5	0	1	0	2	0	0	2	9	8	0	1	dead	28	27	1
54	female		1	0	2	9	6	5	2	8	7	7	5	8	6	3	0	4	dead	63	53	10
59	male		1	1	3	7	8	0	0	1	8	10	10	9	9	2	2	0	dead	62	61	1
21	male		1	2	5	1	7	0	0	3	2	0	5	6	4	0	0	4	dead	28	25	3
52	male		1	1	4	2	1	0	0	1	0	0	1	1	2	0	0	39	alive	8	7	1
50	male		1	1	11	8	9	0	3	3	2	0	7	7	8	0	4	6	dead	47	41	6
50	male		1	1	4	4	4	0	0	7	3	0	0	3	7	2		37	alive	28	21	7
62	female		1	1	3	7	8	6	6	7	8	2	6	8	4	0	0	0	dead	62	49	13
68	male		1	0	7	4	2	0	0	0	0	3	1	1	1	1		12	alive	12	12	0
64	male		1	1	6	2	3	0	1	3	3	1	0	3	4	2	3	41	alive	20	16	4
70	female		1	1	7	7	3	2	1	4	1	0	1	4	1	0	0	5	dead	24	19	5
56	female		1	1	8	4	2	0	0	0	2	0	0	2	5	0	0	19	alive	15	15	0
64	female		1	1	3	2	7	4	2	2	3	7	2	0	4	1	0	0	dead	33	29	4
50	female		1	1	6	8	7	1	0	0	6	0	5	8	3	2	0	15	alive	38	38	0
58	male		1	1	3	7	1	0	0	1	0	0	0	5	0	5	1	9	alive	14	13	1
60	female		1	1	2	5	2	4	0	0	4	0	8	5	3	0	0	16	alive	31	31	0
61	female		1	1	4	6	9	2	5	5	2	2	5	7	10	5	0	1	dead	53	43	10
59	female		1	1	6	3	8	6	6	5	8	3	10	8	8	0	0	1	dead	65	54	11
66	male		1	0	10	5	2	5	0	0	0	0	4	0	1	0	0	2	dead	17	17	0
50	female		1	1	2	4	0	0	0	0	0	0	0	0	0	4	0	14	alive	4	4	0
68	male		1	1	7	8	8	3	1	0	7	3	5	7	3	9	4	2	dead	45	44	1
70	male		1	1	2	7	5	4	5	10	5	4	4	3	7	6	5	10	alive	54	39	15
57	female		1	1	4	10	7	0	0	2	5	0	1	5	0	0	0	0	dead	30	28	2
67	female		1	0	5	10	5	0	6	10	5	3	3	3	3	0	0	14	alive	48	32	16
75	female		1	1	8	4	10	2	0	4	2	5	10	0	5	0	0	2	dead	42	38	4
51	male		1	1	3	5	7	0	6	6	6	5	0	10	8	0		0	dead	53	41	12
64	male		1	1	4	8	0	0	0	3	5	0	6	0	8	5	0	41	alive	30	27	3
48	male		1	1	2	9	9	9	9	9	9	4	3	9	9	1	1	5	dead	79	61	18
58	female		1	1	6	3	3	0	2	2	4	3	3	4	3	8	0	14	alive	27	23	4
63	male		1	1	7	2	1	0	0	0	0	0	2	5	8	0	0	13	alive	18	18	0
72	female		1	1	13	4	5	2	0	0	2	2	5	2	2	0	0	3	dead	24	24	0
48	female		1	0	11	2	2	0	0	0	2	3	0	1	4	0	0	31	alive	14	14	0
77	female		1	0	9	9	8	7	5	7	3	6	8	9	1	9	7	16	alive	63	51	12
59	male		1	1	1	7	4	0	0	0	0	1	2	2	8	0	0	9	alive	24	24	0
57	female		1	1	3	4	0	0	0	0	1	0	3	9	0	5	5	0	dead	17	17	0
77	female		1	1	7	7	0	3	0	0	2	0	7	5	3	0	0	3	dead	27	27	0
51	female		1	1	9	7	7	6	7	9	5	0	9	8	7	7	5	10	alive	65	49	16
54	female		1	1	4	6	6	5	3	3	4	2	7	3	7	4	1	39	alive	46	40	6
78	female		1	1	2	10	10	9	10	10	10	0	0	10	10	1	9	0	dead	79	59	20
49	female		1	1	1	4	2	0	0	0	0	0	4	4	0	0	0	9	alive	14	14	0
47	male		1	1	4	9	7	0	8	8	1	1	2		1	10	0	38	alive	37	21	16
62	female		1	2	4	4	8	4	2	0		3	9		7	7	0	0	dead	37	35	2
63	male		1	1	5	3	5	0	3	0	5	0	6	5	2	0	0	5	dead	29	26	3
49	female		1	1	4	8	8	0	7	0	8	7	4	1	6	0	3	5	dead	49	42	7
73	male		1	1	2	2	6	5	2	4	5	3	6	3	2			14	alive	38	32	6
76	male		1	1	9	6	6	4	2	0	5	3	10		7	9	0	3	dead	43	41	2
74	male		1	1	4	8	0	0	5	0	0	0	0	0	0	0	0	39	alive	13	8	5
69	female		1	2	6	5	10	2	0	0	7	5	2	5	7	0	0	27	alive	43	43	0
46	female		1	1	2	7	7	0	2	2	5	0	9	7	0	0		5	dead	39	35	4
61	male		1	1	3	0	8	0	4	1	1	0	8	5	6	3	0	1	dead	33	28	5
53	male		1	1	4	10	4	4	0	0	4	0	5	2	6	0	0	4	dead	35	35	0
77	female		1	1	5	5	4	0	0	1	2	0	3	3	3	0	0	8	alive	21	20	1
56	male		1	1	2	2	4	0	0	0	0	0	4	6	5	0	0	2	dead	21	21	0
56	female		1	1	2	2	5	0	5	5	0	3	5	5	5	0	0	1	dead	35	25	10
59	female		1	1	4	3	5	0	2	2	0	1	3	7	8	2	0	3	dead	31	27	4
59	male		1	2	3	6	5	5	6	6	6	4	9	7	5	7	6	2	dead	59	47	12
66	female		1	1	7	3	5	0	3	4	3	0	4	4	3	4	1	3	dead	29	22	7
68	female		1	1	7	2	4	1	0	0	1	0	0	1	1	0	0	6	dead	10	10	0
47	male		1	1	5	10	8	0	8	4	0	3	10	10	10	8	0	0	dead	63	51	12
50	female		1	1	8	4	5	0	2	3	3	3	6	5	8	2	2	13	alive	39	34	5
49	female		1	2	4	5	8	8	6	7	5	5	5	6	7	2	5	1	dead	62	49	13
48	male		1	1	2	8	7	1	4	6	4	5	8	7	8	5	1	9	alive	58	48	10
51	male		1	1	2	10	4	2	0	0	3	0	6	3	9	0	0	5	dead	37	37	0
71	male		1	1	3	8	10	9	2	2	9	2	10	7	7	0	4	2	dead	66	62	4
70	male		1	1	5	5	0	0	0	0	0	0	5	5	0	0	0	2	dead	15	15	0
67	male		1	1	4	8	8	6	3	3	7	6	1	1	7	1	0	1	dead	50	44	6
50	female		1	1	6	3	5	2	0	0	0	0	7	9	8	0	6	22	alive	34	34	0
45	male		1	1	4	7	3	0	3	5	3	1	2	2	4	3	2	9	alive	30	22	8
50	female		1	1	5	5	4	4	0	1	2	2	6	4	4	0	0	18	alive	32	31	1
43	male		1	1	7	0	3	1	7	7	7	5	10	6	2	5	2	23	alive	48	34	14
64	female		1	1	2	8	10	10	6	2	2	0	10	9	4	5	1	6	dead	61	53	8
50	female		1	2	7	8	7	0	0	2	1	3	1	3	0	0	0	4	dead	25	23	2
48	male		1	1	1	9	9	3	8	9	9	7	8	7	10	8	7	0	dead	79	62	17
78	female		1	1	10	9	9	7	0	9	6	7	8	5	9	10	3	5	dead	69	60	9
44	male		1	1	2	7	6	0	0	0	0	2	6	4	0	0	0	1	dead	25	25	0
43	male		1	1	4	6	0	0	0	3	3	1	1	2	6	6	0	2	dead	22	19	3
62	male		1	1	5	2	0	8	0	0	0	0	9	5	0	0	0	1	dead	24	24	0
53	male		1	1	3	0	0	0	0	0	0	0	0	0	1	0	0	10	alive	1	1	0
48	male		1	1	3	2	8	1	1	0	0	1	0	3	7	0		0	dead	23	22	1
70	male		1	1	8	3	3	0	0	1	3	0	2	4	4	2	0	15	alive	20	19	1
62	female		1	1	6	9	8	1	0	4	8	5	7	8	6	0	0	1	dead	56	52	4
66	female		1	1	4	7	6	0	0	0	0	7	5	3	4	0	0	1	dead	32	32	0
62	male		1	0	5	5	9	0	9	2	2	8	0	2	7	7	0	0	dead	44	33	11
20	female		1	1	2	8	6	2	7	9	5	0	7	7	6	10	0	10	alive	57	41	16
46	male		1	1	1	9	7	0	1	2	1	5	9	5	0	0	0	1	dead	39	36	3
20	female		1	1	7	7	7	5	8	8	3	0	6	7	8	2	4	8	alive	59	43	16
61	male		1	1	4	0	2	0	0	3	2	0	2	3	4	0	0	1	dead	16	13	3
77	female		1	1	8	8	7	7	4	4	4	2	8	7	6	9	1	4	dead	57	49	8
54	male		1	1	3	6	5	0	3	4	0	6	7	5	3	3	3	1	dead	39	32	7
73	female		1	1	5	7	8	6	3	3	8	7	8	8	5	0	0	3	dead	63	57	6
48	female		1	1	5	5	0	0	5	5	0	0	3	5	4	0	4	13	alive	27	17	10
51	male		1	1	8	8	7	4	2	3	9	2	6	9	10	0	0	3	dead	60	55	5
44	female		1	1	10	6	5	0	0	1	0	0	3	5	4	0	0	0	dead	24	23	1
69	female		1	1	7	3	5	0	3	3	5	0	5	5	1	0	0	1	dead	30	24	6
42	male		1	1	6	6	8	5	3	5	9	0	10	6	1	4	5	11	alive	53	45	8
62	female		1	1	7	8	8	7	1	1	10	2	10	10	6	3	0	5	dead	63	61	2
48	male		1	1	0	6	7	7	2	1	7	1	8	1	1	0	0	0	dead	41	38	3
43	female		1	1	2	6	10	2	0	0	8	3	3	7	2	3	0	0	dead	41	41	0
56	female		1	1	5	2	3	0	1	1	3	1	2	2	1	1	1	4	dead	16	14	2
48	female		1	1	1	4	8	0	7	1	10	2	5	5	2	8	1	37	alive	44	36	8
56	male		1	2	8	0	2	0	0	2	0	0	4	4	1	0	0	26	alive	13	11	2
67	male		1	1	3	7	4	0	0	0	3	2	1	7	7	0	0	4	dead	31	31	0
65	female		1	1	9	3	2	0	0	0	0	1	1	0	0	0	0	18	alive	7	7	0
43	female		1	1	3	5	8	0	3	4	1	0	8	9	9	0	0	3	dead	47	40	7
78	male		1	1	6	4	0	0	0	0	1	0	0	5	3	0	0	3	dead	13	13	0
46	female		1	1	6	8	5	3	0	4	4	1	5	9	9	9	0	3	dead	48	44	4
73	male		1	1	8	10	8	0	0	0	0	2	5		0			0	dead	25	25	0
51	male		1	1	1	4	2	0	1	1	1	6	8	4	3	2	0	1	dead	30	28	2
52	female		1	1	1	5	7	0	0	0	0	0	7	6	8	2	2	1	dead	33	33	0
41	male		1	1	1	2	4	5	0	1	0	1	0	1	5	0	0	10	alive	19	18	1
40	male		1	1	3	7	7	7	1	0	0	6	1	4	3	0	0	4	dead	36	35	1
46	female		1	1	3	2	4	2	4	3	1	4	8	7	5			1	dead	40	33	7
56	female		1	1	6	5	6	4	8	9	7	0	8	7	10	5	2	3	dead	64	47	17
53	female		1	1	4	5	5	0	0	2	5	1	3	0	1	10	1	4	dead	22	20	2
51	female		1	2	1	10	7	0	0	0	6	0	2	5	10	0	0	1	dead	40	40	0
56	male		1	1	4	2	8	0	1	1	1	9	2	2	2	0	0	0	dead	28	26	2
42	female		1	1	5	8	7	6	5	8	0	4	10	8	7			5	dead	63	50	13
72	female		1	2	6	10	1	0	0	0	0	0	0	0	1	4	0	3	dead	12	12	0
72	female		1	1	6	9	7	0	5	5	6	5	2	6	2	1	1	11	alive	47	37	10
71	male		1	1	2	8	0	0	0	0	0	0	2	5	9	0	0	17	alive	24	24	0
52	female		1	1	2	0	4	2	4	2	1	3	1	3	3	0	1	35	alive	23	17	6
84	female		1	1	12	7	8	0	2	0	6	8	5	3	0	4	5	35	alive	39	37	2
52	female		1	1	0	2	2	1	0	2	0	0	0	2	0	0	0	5	dead	9	7	2
72	male		1	1	5	5	6	0	4	8	1	5	0	2	10	6	0	10	alive	41	29	12
70	male		1	1	13	4	3	4	4	7	3	2	6	4	4	6	3	34	alive	41	30	11
51	male		1	1	4	5	8	5	2	4	5	7	7	8	9	5	5	4	dead	60	54	6
54	female		1	1	6	7	5	0	6	7	6	0	5	4	0	6	0	11	alive	40	27	13
69	male		1	1	3	5	5	0	2	9	2	4	0	1	2	1	0	15	alive	30	19	11
92	male		1	0	6	3	9	0	0	0	5	3	9	6	7	7	3	5	dead	42	42	0
34	male		1	1	1	0	7	1	0	0	3	5	8	8	8	0	0	6	dead	40	40	0
46	male		1	1	4	6	5	3	0	7	3	3	8	5	5	2	0	26	alive	45	38	7
40	female		1	1	3	8	8	5	0	3	8	0	3	3	5	8	0	4	dead	43	40	3
65	male		1	1	4	4	3	0	2	0	6	1	6	5	7	0	0	31	alive	34	32	2
70	male		1	1	6	7	7	0	0	6	0	0	5	5	10	0	0	4	dead	40	34	6
69	female		1	1	9	1	5	0	0	0	4	0	3	3	6	6	0	22	alive	22	22	0
52	female		1	1	2	0	1	0	0	0	2	0	1	0	2	0	0	6	dead	6	6	0
62	female		1	0	5	3	0	0	0	0	1	0	0	2	2	0	0	30	alive	8	8	0
38	female		1	1	3	2	2	2	0	5	7	6	7	6	6	0	0	1	dead	43	38	5
50	female		1	1	6	5	5	0	0	5	4	0	0	5	5	5	0	7	alive	29	24	5
37	male		1	1	6	8	5	4	0	4	0	0	7	5	0	0	5	10	alive	33	29	4
79	female		1	1	10	4	6	3	3	4	4	7	9	5	2	3	3	7	alive	47	40	7
42	female		1	1	2	5	4	2	2	4	0	3	8	10	6	0	0	0	dead	44	38	6
54	male		1	1	4	7	5	0	1	1	3	0	3	2	3	2	1	3	dead	25	23	2
71	female		1	1	4	8	3	0	8	2	2	8	9	8	10	3	0	1	dead	58	48	10
72	male		1	0	4	8	7	0	0	5	7	8	0	5	8	0	0	2	dead	48	43	5
71	female		1	1	6	8	8	6	3	3	7	6	2	6	7	8	5	4	dead	56	50	6
40	female		1	1	2	0	10	4	1	0	0	0	0	7	10	0	0	2	dead	32	31	1
55	female		1	1	3	0	1	3	0	1	1	1	1	5	0	4	0	33	alive	13	12	1
65	female		1	1	6	0	9	0	0	0	0	0			0	0	0	0	dead	9	9	0
49	female		1	1	2	8	1	9	0	0	5	0	8	10	1	0	0	3	dead	42	42	0
65	female		1	1	7	4	3	0	0	0	0	0	1	1	1	3	0	19	alive	10	10	0
56	female		1	0	3	6	10	10	3	3	10	0	3	10	8	7	0	12	alive	63	57	6
60	female		1	1	7	0	2	0	0	0	0	0	2	1	1	0	1	3	dead	6	6	0
76	female		1	1	3	8	7	0	4	7	0	2	7	0	7	0	0	33	alive	42	31	11
50	male		1	2	3	2	4	0	0	2	2	0	3	2	5	4	0	1	dead	20	18	2
58	female		1	1	4	4	2	0	0	0	0	1	2	2	0	0	0	6	dead	11	11	0
51	female		1	0	3	8	3	0	0	0	5	0	10	8	10	0	0	0	dead	44	44	0
50	male		1	1	3	8	7	0	0	0	3	4	3	3	0	0	0	4	dead	28	28	0
68	male		1	1	0	10	9	7	0	2	10	0	7	8	9	0	0	1	dead	62	60	2
72	female		1	1	6	0	0	0	0	2	0	3	0	0	3	2	0	19	alive	8	6	2
64	male		1	1	9	9	9	0	0	5	5	7	0	1	5	6	0	9	alive	41	36	5
40	male		1	1	3	6	5	0	2	3	0	0	5	4	8	0	4	4	dead	33	28	5
47	female		1	1	2	9	7	0	1	1	2	0	8	3	3	5	1	0	dead	34	32	2
38	male		1	1	4	2	5	2	3	3	1	1	4	3	1	1	1	10	alive	25	19	6
37	female		1	1	4	9	7	0	10	4	2	0	0	8	3	0	0	7	alive	43	29	14
37	male		1	1	5	7	1	0	5	9	1	1	0	2	8	0	0	4	dead	34	20	14
52	female		1	1	2	8	10	0	6	8	8	0	5	8	7	10	0	9	alive	60	46	14
55	male		1	1	7	5	5	0	1	0	0	0	0	5	2	0	0	9	alive	18	17	1
61	male		1	1	5	7	8	3	8	8	8	6	9	9	9	0	0	1	dead	75	59	16
46	female		1	1	8	3	4	0	6	6	0	0	0	3	10	8	0	32	alive	32	20	12
70	male		1	1	10	2	6	0	0	0	4	3	8	3	0	0	0	0	dead	26	26	0
36	female		1	1	4	8	1	1	0	0	0	0	5	5	3	0	0	3	dead	23	23	0
73	male		1	1	6	7	3	0	0	0	5	0	5	0	2	0	0	0	dead	22	22	0
75	male		1	1	9	4	6	0	0	0	0	0	0	0	6	0	0	33	alive	16	16	0
73	female		1	1	8	6	5	0	6	6	2	1	3	4	7			10	alive	40	28	12
47	male		1	1	3	9						9						0	dead	18	18
68	male		1	1	6	10	4	0	0	10	0	5	7	5	0	0	0	1	dead	41	31	10
40	male		1	1	5	2	4	1	0	0	2	3	0	0	0	0	0	1	dead	12	12	0
51	male		1	1	4	3	9	9	3	0	0	3	10	8	8	0	0	8	alive	53	50	3
64	male		1	1	4	1	5	0	0	1	2	0	8	0	10	0	0	3	dead	27	26	1
80	female		1	1	10	3	1	3	0	5	2	3	7	5	8	1	1	14	alive	37	32	5
72	female		1	1	2	10	5	3	3	3	4	2	7	9	7	4	0	1	dead	53	47	6
70	male		1	1	6	2	5	0	0	0	0	0	0	0	8	0	0	14	alive	15	15	0
59	female		1	1	6	5	8	6	2	2	3	0	10	9	4	3	2	2	dead	49	45	4
52	male		1	1	3	8	6	6			0	5	10		10			1	dead	45	45
37	female		1	1	4	3	7	0	0	0	0	5	5	6	4	0	0	0	dead	30	30	0
49	male		1	1	1	5	10	0	5	5	10	9	10	10	7	8	0	3	dead	71	61	10
63	female		1	1	5	2	1	0	4	4	2	0	5	3	2	7	4	0	dead	23	15	8
40	male		1	1	1	0	7	0	0	0	2	2	3	1	1			20	alive	16	16	0
65	male		1	1	4	7	4	2	5	5	4	2	4	4	4	2	4	0	dead	41	31	10
58	male		1	1	4	5	5	2	4	5	5	4	8	3	5	3	3	1	dead	46	37	9
70	male		1	1	4	7	8	5	8	5	10	7	9	6	6	5	7	2	dead	71	58	13
72	male		1	1	6	0	3	0	7	7	2	3	7	8	7	8	6	22	alive	44	30	14
79	female		1	1	10	8	10	10	2	3	5	7		8	5	0	0	4	dead	58	53	5
64	male		1	1	4	6	5	4	0	3	2	0	4	6	7	3	5	0	dead	37	34	3
64	female		1	1	9	9	6	0	4	0	5	0	2	5	4	10	5	0	dead	35	31	4
55	female		1	1	6	10	3	2	5	0	6	0	0	5	5			8	alive	36	31	5
40	female		1	1	2	5	6	6	0	2	4	0	6	5	5	1	0	9	alive	39	37	2
55	male		1	0	4	6	3	0	0	1	0	9	4	1	3	0	0	1	dead	27	26	1
50	female		1	1	7	8	5	0	0	7	0	1	5	6	6	0	10	3	dead	38	31	7
79	male		1	1	6	6	8	0	0	0	5	3	4	5	4	0	0	1	dead	35	35	0
73	female		1	1	9	7	8	10	7	10	9	1	6		9	0	5	1	dead	67	50	17
72	female		1	1	3	0	3	0	0	0	0	4	6	5	5	0	0	12	alive	23	23	0
71	female		1	1	6	5	7	7	2	2	7	3	1	2	8	3	1	1	dead	44	40	4
51	male		1	1	1	4	4	4	1	1	3	5	6	3	6	0	1	1	dead	37	35	2
62	female		1	1	8	6	7	0	2	0	0	4	0	4	6	0	0	9	alive	29	27	2
59	female		1	0	2	4	0	0	0	0	0	0	1	3	1	1	1	13	alive	9	9	0
46	female		1	1	11	2	1	0	0	1	0	0	2	1	3	3	0	9	alive	10	9	1
53	male		1	1	2	8	0	0	0	0	3	0	9	6	5	0		1	dead	31	31	0
71	female		1	0	7	5	3	0	0	0	0	0	5	7	4	0	0	18	alive	24	24	0
69	female		1	1	8	7	0	3	1	1	1	0	3	2	1	1	0	11	alive	19	17	2
63	female		1	1	5	10	0	6	0	0	4	0	10	5	1	0	0	2	dead	36	36	0
68	female		1	1	6	4	6	6	0	0	0	0	4		5	0	0	8	alive	25	25	0
89	male		1	1	4	1	0	0	0	1	0	0	0	1	3	2	0	26	alive	6	5	1
77	female		1	1	11	3	4	0	0	0	1	2	3	3	2	0	0	24	alive	18	18	0
